# Supplementary material for: Mesenchymal stem cell derived exosomes and injectable platelet-rich fibrin enhance SDFT healing in a donkey tendonitis model
Source: Sci Rep. 2026 Apr 10;16:12013. doi: 10.1038/s41598-026-44967-7 (PMC13069002; doi:10.1038/s41598-026-44967-7)
Supplement: Supplementary file 1 — Supplementary Material 1 [file 41598_2026_44967_MOESM1_ESM.docx]

| **Table S1.** Modified ultrasound scoring system for evaluation FES & FAS **(Depuydt et al., 2021).** | | |
| --- | --- | --- |
| **Score** | **Fiber echogenicity score (FES)**  **(Transverse plane)** | **Fiber alignment score (FAS)**  **(Sagittal plane)** |
| **-1** | Hyperechoic |  |
| **0** | Normoechoic  Normal to nearly normal echogenicity | Fibers with >75 % Alignment  Normal to near normal pattern |
| **1** | Hypoechoic  25- 50% loss of normal echogenicity | Fibers with 50–74 % of normal pattern Alignment |
| **2** | Mixed echogenicity  50% anechoic and 50% normal echogenic | Fibers with 25–49% of normal pattern Alignment |
| **3** | Mostly to completely anechoic | Fibers with <25 % of normal pattern Alignment |

| **Table S2.** A modified scoring system of Movin’s grading **(Movin et al., 1997).** | | | | |
| --- | --- | --- | --- | --- |
| **Tendon repair assessment score** | | | | |
| **Score** | 0 | 1 | 2 | 3 |
| Fiber structure | Continuous, long fiber | Slightly fragmented fiber | Moderately  fragmented fiber | Severely fragmented fiber |
| Fiber arrangement | Compacted and parallel | Slightly loose and wavy | Moderately loose, wavy and cross to each other | No identifiable pattern |
| Inflammation | < 10% | 10–20% | 20–30% | > 30% |
| Angiogenesis | < 10% | 10–20% | 20–30% | > 30% |
| Cell density | Normal pattern | Slightly increase | Moderately increase | Severely increase |
| Rounding of the nuclei | Long spindle shaped | Slightly rounding | Moderately rounding | Severely rounding |
| Histopathological healing score | Grade 0: Normal | Grade I:  nearly normal | Grade II:  abnormal | Grade III:  severely abnormal |

| **Table S3.** Showing the clinical evaluation parameters during the tendonitis induction time. | | | | | | | |
| --- | --- | --- | --- | --- | --- | --- | --- |
|  | Lameness | Pain | Heat | General Appearance | Standing Posture | Resting Posture | Total Discomfort |
| Normal | 0 d | 0e | 0e | 0 c | 0 b | 0 b | 0 c |
| Ti1 | 5 (5-5)a | 3 (3-3)a | 3 (3-3)a | 1 (1-2)a | 1 (1-1)a | 1 (1-2)a | 3(3-5) a |
| Ti2 | 5 (5-5) a | 3 (3-3) a | 3 (3-3) a | 1 (1-1) a | 1 (1-1) a | 1 (1-1) a | 3(3-3) a |
| Ti3 | 4 (4-5) a | 2 (1-2) b | 2 (1-2) b | 1 (0-1) ab | 1 (0-1) a | 1 (1-1) a | 3(1-3) a |
| Ti4 | 2 (2-3) b | 1 (1-1) c | 1 (1-1) c | 1 (0-1) b | 0 (0-0) b | 0 (0-1) b | 1(0-1) b |
| Ti5 | 2 (1-2) bc | 1 (0-1) cd | 1 (0-1) cd | 0 (0-1) c | 0 (0-0) b | 0 (0-0) b | 0(0-1) bc |
| Ti6 | 1 (1-2) c | 1 (0-1) cd | 1 (0-1) cd | 0 (0-0) c | 0 (0-0) b | 0 (0-0) b | 0(0-0) c |
| Ti7=T0 | 0 (0-1) d | 0 (0-1) de | 0 (0-1) de | 0 (0-0)c | 0 (0-0) b | 0 (0-0) b | 0(0-0) c |
| Test statistics | 162.305 | 157.319 | 157.319 | 122.218 | 154.507 | 161.435 | 151.946 |
| P value | 0.000 | 0.000 | 0.000 | 0.000 | 0.000 | 0.000 | 0.000 |
| Times with different superscript letters are significantly different at P<0.05, df = 7 and test statistic of Freidman test. Ti1 to Ti7 represent the tendonitis induction period (days 1 to 7 post-collagenase injection), with Ti7 corresponding to T0, the treatment initiation point. | | | | | | | |

| **Table S4**. Showing assessments of Tendon shape upon palpation and Intensifying weight bearing response under static condition before (Ti7=T0) and after treatment (T20). | | | | | |
| --- | --- | --- | --- | --- | --- |
| Tendon shape upon palpation | | | | | |
|  | Placebo | PRF | PRF/Exosome | Test statistic | P value |
| Normal | 0 (0-0)**b** | 0 (0-0)**b** | 0 (0-0)**b** |  |  |
| Ti7=T0 | 3 (3-3)**a** | 3 (3-3)**a** | 3 (3-3)**a** | 0.00 | 1.000 |
| T20 | 4 (4-4)**a** | 1 (0-1)**b*** | 0 (0-1)**b*** | 19.806 | 0.000 |
| Test statistic | 12.00 | 11.565 | 11.474 |  |  |
| P value | 0.002 | 0.003 | 0.003 |  |  |
| Intensifying weight bearing Response (Static examination) | | | | | |
| Normal | 0**b** | 0**b** | 0**b** |  |  |
| Ti7=T0 | 3 (3-3)**a** | 3 (3-3)**a** | 3 (3-3)**a** | 0.000 | 1.000 |
| T20 | 1 (1-1)**ab** | 0 (0-1)**b** | 0 (0-0)**b*** | 16.867 | 0.001 |
| Test statistic | 12.000 | 11.143 | 12.000 |  |  |
| P value | 0.002 | 0.004 | 0.002 |  |  |
| Times with different superscript letters in the same group are significantly different at p<0.05  *****there is a significant difference compared to the control group at p<0.05  **#** there is a significant difference compared to the PRF group in the same time at p<0.05 | | | | | |

| **Table S5**. Showing the ultrasonographic results of SDF tendon cross section are (T-CSA), lesion cross sectional area (L-CSA), and lesion percentage (Lesion %) before (normal) and seven days after the collagenase injection (Ti7=T0). | | | | |
| --- | --- | --- | --- | --- |
|  | T-CSA | | L-CSA | Lesion % |
| Normal | Ti7=T0 | Ti7=T0 | Ti7=T0 |
| Placebo | 31.2 ±0.422 | 50.2±1.3 | 21.3±1.3 | 42.2± 2.0 |
| PRF | 28.1 ±0.730 | 38.4±1.2 | 15.7±0.9 | 40.9± 2.1 |
| PRF/Exosome | 26 ±0.730 | 32.7±0.8 | 11.4±0.8 | 34.7± 3.4 |

| **Table S6**. Ultrasonographic assessment of lesion percentage (Lesion %) overtime after treatment. | | | |
| --- | --- | --- | --- |
| **Evaluation times** | **Group** | | |
| Placebo | PRF | PRF/Exosome |
| Ti7 = T0 | 42.2± 2.0**efg** | 40.9± 2.1**bc** | 34.7± 3.4**ac** |
| T1 | 53.9± 0.5**bc** | 38.4± 1.6**cd*** | 32.4± 0**abc** |
| T2 | 53.7± 1.8**cd** | 45.3± 1.6**b*** | 34.8± 1.5**a*** |
| T4 | 58.9±1.8**a** | 53.7± 1.2**a** | 35.8± 1.6**ac*#** |
| T6 | 58.3± 0.3**ad** | 52.2± 1.5**a** | 32.2± 2.4**acd*#** |
| T8 | 46.9± 1.9**e** | 41.3± 1.9**bcd** | 29.5± 2.2**bc*** |
| T10 | 51.5± 1.0**c** | 28.9± 1.6**ef*** | 27.5± 1.2**bd*** |
| T12 | 42± 0.9**f** | 35.2± 2.3**de*** | 23.1± 1.8**b*#** |
| T14 | 38.6± 1.3**fg** | 23.9± 2.1**fg*** | 13.3± 2.4**e*#** |
| T16 | 36.9± 2.2**g** | 20.8± 1.7**g*** | 8.6± 1.5**f*#** |
| T18 | 27.9± 1.3**h** | 17.9± 1.6**g*** | 0**g*#** |
| T20 | 26.9± 1.5**h** | 0**h*** | 0**g*** |
| Times with different superscript letters are significantly different at p<0.05.  * there is a significant difference compared to the placebo group in the same time at p < 0.05  # there is a significant difference compared to the PRF group in the same time at p < 0.05 | | | |

| **Table S7**. Showing results of tendon cross sectional area (T-CSA) across the treatment groups. | | | |
| --- | --- | --- | --- |
| **Evaluation times** | **Group** | | |
| Placebo | PRF | PRF/Exosome |
| Ti7=T0 | 50.2±1.3**bc** | 38.4±1.2**fg** | 32.7±0.8**ef** |
| T1 | 50.9 ±0.6**b** | 44.6± 0.9**cd*** | 36.5 ±0**c*** |
| T2 | 56.5±0.8**a** | 42.9± 1.0**de** | 33.1±0.8**e*#** |
| T4 | 46.4±0.8**cd** | 46.8±1.6**bc*** | 42.6±0.5**a*** |
| T6 | 57.1±0.9**a** | 44.6±0.8**cd** | 35.4±0.5**d*#** |
| T8 | 31.8±0.9**fg** | 39.4±0.9**fg*** | 38.8±0.9**b*#** |
| T10 | 29.9±1.5**g** | 53.4±0.7**a*** | 42.3±0.7**a*#** |
| T12 | 44.6±1.1**d** | 30.4±0.7**h*** | 31.7±0.6**ef#** |
| T14 | 49.6±0.8**b** | 47.6±0.8**b*** | 33.0±0.9**e#** |
| T16 | 46.2±0.7**cd** | 40.9±0.7**f*** | 31.3±0.8**f** |
| T18 | 34±0.9**ef** | 46.5±0.7**bc*** | 35.3±0.8**cd*#** |
| T20 | 35.4±0.6**e** | 37.6±0.8**g*** | 32.3±1.7**ef*** |
| Times with different superscript letters are significantly different at p<0.05.  ***** there is a significant difference compared to the placebo group in the same time at p < 0.05  **#** there is a significant difference compared to the PRF group in the same time at p < 0.05 | | | |

| **Table S8**. Showing results of ultrasonographic assessment of SDFT fiber echogenicity score (FES). | | | | | |
| --- | --- | --- | --- | --- | --- |
| **Evaluation Times** | **Group** | | | Kruskal-Wallis | P value |
| Placebo | PRF | PRF/Exosome |
| T0 | 3(3-3)**a** | 3(3-3)**a** | 3(3-3)**a** | 0.00 | 1.000 |
| T1 | 3(3-3)**a** | 3(3-3)**a** | 3(3-3)**a** | 0.00 | 1.000 |
| T2 | 3(3-3)**a** | 3(3-3)**a** | 3(3-3)**a** | 13.800 | 0.003 |
| T4 | 3(3-3)**a** | 3(2-3)**ab** | 3(2-3)**ab** | 7.667 | 0.053 |
| T6 | 2(2-3)**ab** | 3(2-3)**ab** | 3(2-3)**ab** | 4.343 | 0.227 |
| T8 | 2(2-3)**ab** | 3(2-3)**ab** | 2(2-3)**abc#** | 10.062 | 0.018 |
| T10 | 2(2-2)**b** | 2(2-2)**bc** | 2(1-2)**bcd** | 10.411 | 0.0.015 |
| T12 | 2(1-2)**b** | 2(2-2)**bc** | 1(1-2)**cd*#** | 16.611 | 0.001 |
| T14 | 2(1-2)**b** | 2(2-2)**bc** | 1(1-2)**cd#** | 19.806 | 0.000 |
| T16 | 1(1-2)**b** | 1(1-2)**c** | 1(0-1)**d** | 15.889 | 0.001 |
| T18 | -1(-1/-1)**c** | 1(1-1)**c*** | 0.5(0-1)**d*** | 20.240 | 0.000 |
| T20 | -1(-1/-1)**c** | 0(0-1)**c*** | 0(0-1)**d*** | 18.254 | 0.000 |
| Freidman test | 61.519 | 60.769 | 62.143 |  |  |
| P value | 0.000 | 0.000 | 0.000 |  |  |
| Times with different superscript letters are significantly different at p < 0.05, df = 11  ***** significant difference compared to the placebo group in the same time at p < 0.05, df = 3  **#** significant difference compared to the PRF group in the same time at p < 0.05, df = 3 | | | | | |

| **Table S9**. Showing results of ultrasonographic assessment of SDFT fiber alignment score (FAS). | | | | | |
| --- | --- | --- | --- | --- | --- |
| **Evaluation Times** | **Group** | | | Kruskal-Wallis | P value |
| Placebo | PRF | PRF/Exosome |
| T0 | 3(3-3)**a** | 3(3-3)**a** | 3(3-3)**a** | 0.000 | 1.000 |
| T1 | 3(3-3)**a** | 3(3-3)**a** | 3(3-3)**a** | 0.000 | 1.000 |
| T2 | 3(3-3)**a** | 3(3-3)**a** | 3(3-3)**a** | 0.000 | 1.000 |
| T4 | 3(3-3)**a** | 3(3-3)**a** | 3(3-3)**a** | 23.000 | 0.000 |
| T6 | 3(3-3)**a** | 3(3-3)**a** | 3(3-3)**a** | 23.000 | 0.000 |
| T8 | 3(3-3)**a** | 3(3-3)**ab** | 3(3-3)**ab** | 13.636 | 0.003 |
| T10 | 3(3-3)**a** | 3(3-3)**ab** | 2.5(2-3)**ab** | 17.250 | 0.001 |
| T12 | 3(2-3)**ab** | 3(2-3)**b** | 2(2-2)**bc** | 18.708 | 0.000 |
| T14 | 3(2-3)**ab** | 2(2-2)**b** | 2(2-2)**bc** | 19.941 | 0.000 |
| T16 | 2(2-2)**b** | 2(2-2)**b** | 2(1-2)**bc** | 18.553 | 0.000 |
| T18 | 2(2-2)**b** | 2(2-2)**b** | 1(1-2)**c*#** | 21.349 | 0.000 |
| T20 | 2(2-2)**b** | 1.5(1-2)**b** | 1(0-1)**c** | 19.499 | 0.000 |
| Freidman test | 56.112 | 53.907 | 59.814 |  |  |
| P value | 0.000 | 0.000 | 0.000 |  |  |
| Times with different superscript letters are significantly different at p < 0.05, df = 11  * significant difference compared to the placebo group in the same time at p < 0.05, df = 3  # significant difference compared to the PRF group in the same time at p < 0.05, df = 3 | | | | | |

| **Table S10. Quantitative analysis of collagen type I and type III area percentages in SDFT across experimental groups.** | | | | | | |
| --- | --- | --- | --- | --- | --- | --- |
| **Group** | **Evaluation times** | | | | | |
| **T8** | | **T14** | | **T20** | |
|  | **Collagen type III** | | | | | |
| Placebo | 14.9±0.52**a** | | | 6.76±0.24**b** | | 10.89±0.45**c** |
| PRF | 6.9±0.58**a*** | | | 12.81±0.44**b*** | | 1.65±0.12**c*** |
| PRF/Exosome | 13.2±0.52**a*#** | | | 3.07±0.33**b*#** | | 0.39±0.16**c*#** |
|  | **Collagen type I** | | | | | |
| Placebo |  | 0.022±0.005**a** | | 0.020±0.014**a** | | 0.494±0.122**b** |
| PRF |  | 0.92±0.11**a** | | 3.197±0.26 **b*** | | 10.17±0.64**c*** |
| PRF/Exosome |  | 0.13±0.05**a** | | 8.24±0.35 **b*#** | | 21.93±0.79 **c*#** |
| Times with different superscript letters are significantly different at p < 0.05  ***** significant difference compared to the placebo group in the same time at p < 0.05  **#** significant difference compared to the PRF group in the same time at p < 0.05 | | | | | | |

| **Table S11.** Comparative biomechanical properties of SDFT across experimental groups at T20. | | | |
| --- | --- | --- | --- |
|  | Load at failure (N) | Failure stress (MPa) | Strain (%) |
| Normal | 2193.04 ±149.6**a** | 72.9 ± 1.9**a** | 59.5 ±7.9**a** |
| Placebo | 1393.98 ±124.08**b** | 44.7 ± 3.5**d** | 15.32 ±5.3**c** |
| PRF | 1552.39 ±55.2**b** | 55.3 ± 5.7**c** | 23.8 ±6.1**c** |
| PRF/Ex | 1567.87±145.37**b** | 60.24 ± 3.5**c** | 42.9 ±5.5**b** |
| Groups with different superscript letters are significantly different at p < 0.05 | | | |
